# Supplementary material
Source: PubMed Central journal article supplement (PMC9090779)
Supplement: 41418_2022_946_MOESM3_ESM.pdf [file 41418_2022_946_MOESM3_ESM.pdf]

## Supplementary Fig. S2

a. human CD4 expression on tamoxifen-treated lymphomas

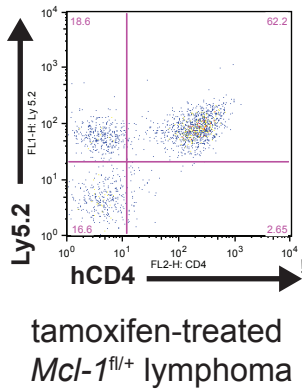

b. *Mcl-1<sup>fl/+</sup>* recombination DNA genotyping

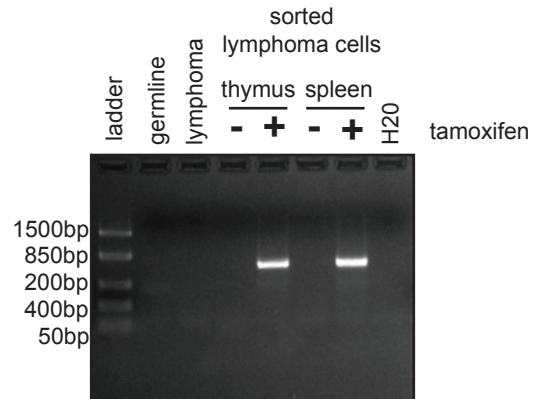

c. MCL-1 deletion in *Mcl-1<sup>fl/+</sup>* lymphomas

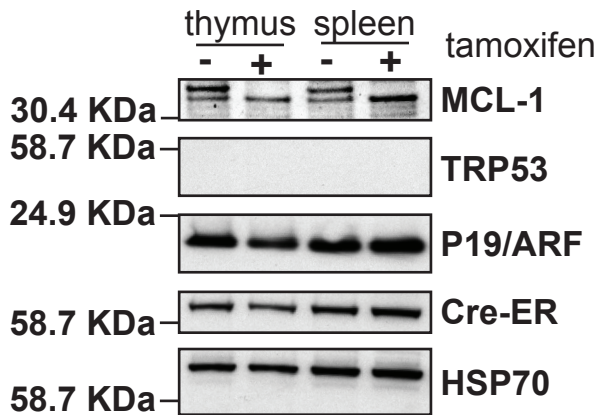

sorted lymphoma cells

d. *Trp53* DNA genotyping

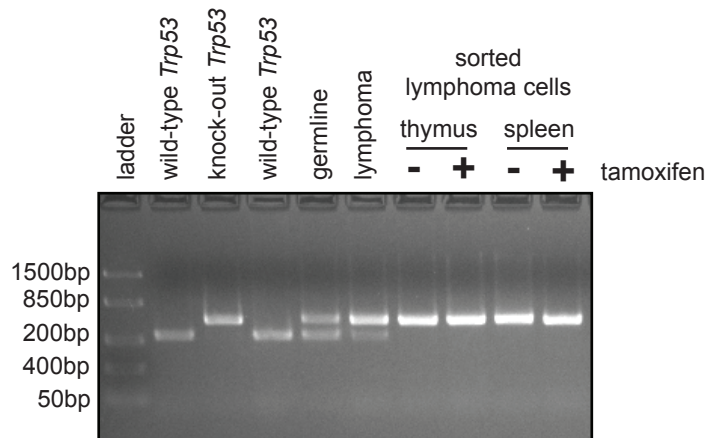

e.

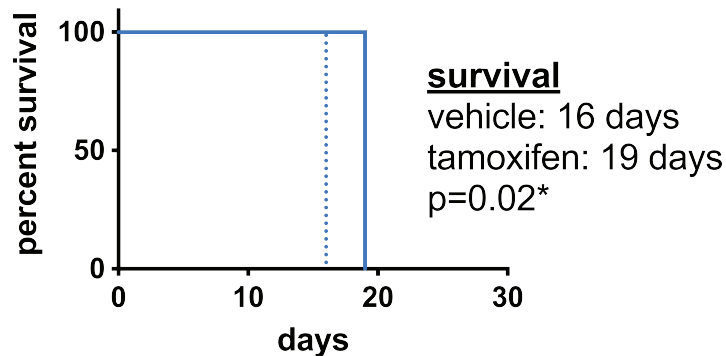

— *EμMyc; CreERT2; Mcl-1<sup>+/+</sup>; Trp53<sup>-/-</sup>*: tamoxifen day 5,6 (N=1; n=3)

⋯ *EμMyc; CreERT2; Mcl-1<sup>+/+</sup>; Trp53<sup>-/-</sup>*: vehicle day 5,6 (N=1; n=3)
