# Supplementary material
Source: PubMed Central journal article supplement (PMC9090779)

# Supplementary Fig. S1

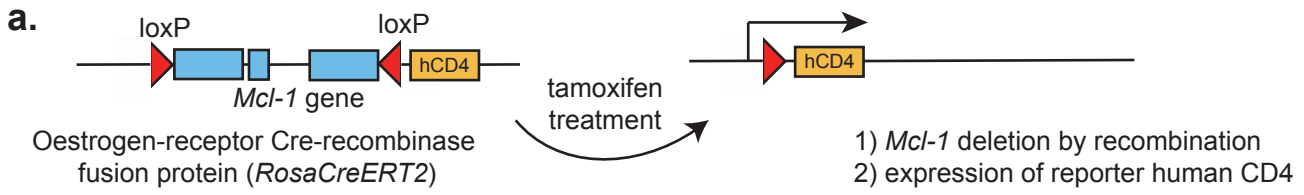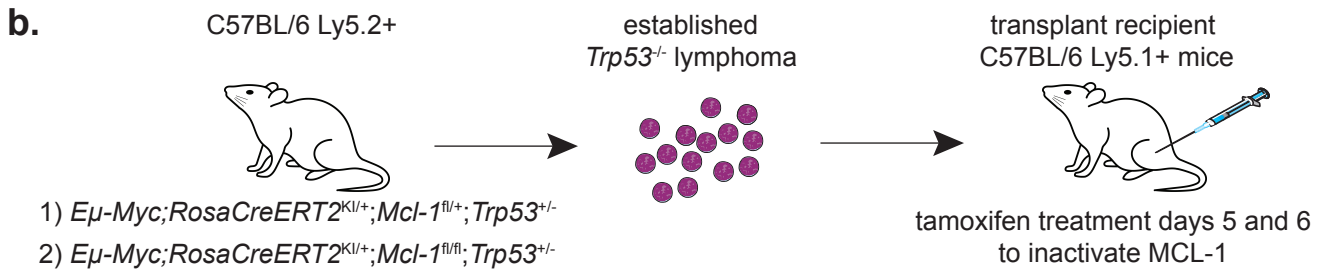

Supplement: 41418_2022_946_MOESM2_ESM.pdf [file 41418_2022_946_MOESM2_ESM.pdf]

# Supplementary Fig. S3

a.

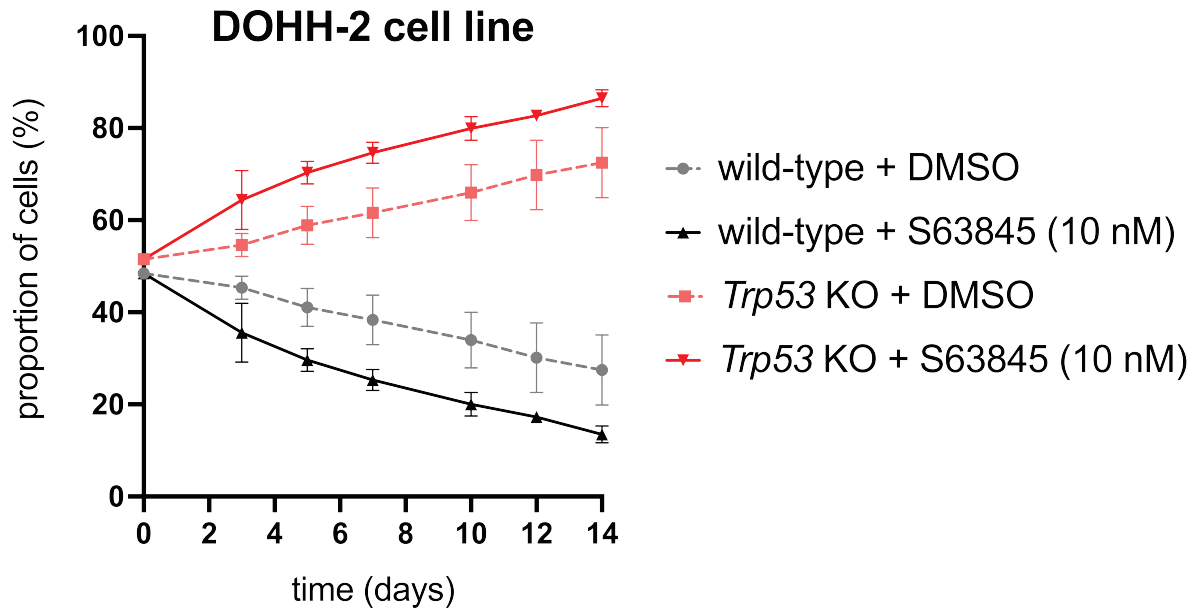

Supplement: 41418_2022_946_MOESM4_ESM.pdf [file 41418_2022_946_MOESM4_ESM.pdf]
